# Supplementary material for: WNK4 is the major WNK positively regulating NCC in the mouse kidney
Source: PubMed Central journal article supplement (PMC4212913; doi:10.1042/bsr20140047), 2014-05-09
Supplement: bsr034e107add.pdf [file bsr034e107add.pdf]

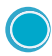

OPEN ACCESS

## SUPPLEMENTARY DATA

## WNK4 is the major WNK positively regulating NCC in the mouse kidney

Daiei TAKAHASHI\*, Takayasu MORI\*, Naohiro NOMURA\*, Muhammad Zakir Hossain KHAN\*, Yuya ARAKI\*, Moko ZENIYA\*, Eisei SOHARA\*, Tatemitsu RAI\*, Sei SASAKI\* and Shinichi UCHIDA\*<sup>1</sup>

\*Department of Nephrology, Graduate School of Medical and Dental Sciences, Tokyo Medical and Dental University, 1-5-45 Yushima, Bunkyo, Tokyo 113-8519, Japan

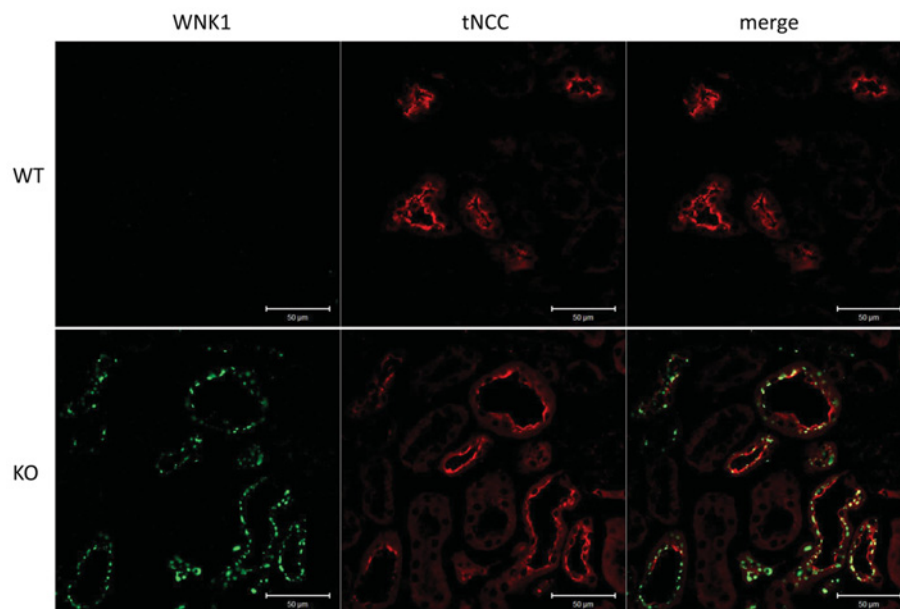**Figure S1 Immunofluorescence of WNK1 and NCC in the kidney**

The immunofluorescence of WNK1 and NCC in the kidneys of WNK4<sup>+/+</sup> and WNK4<sup>-/-</sup> mice. An apparent increase in WNK1 in the kidneys of WNK4<sup>-/-</sup> mice was only observed in the distal convoluted tubules (DCT). However, the DCT appeared to be dilated with a reduced cell height and NCC immunofluorescence.

---

Received 6 March 2014/19 March 2014; accepted 21 March 2014

Published as Immediate Publication 21 March 2014, doi 10.1042/BSR20140047

---

<sup>1</sup> To whom correspondence should be addressed (email suchida.kid@tmd.ac.jp)
